# Supplementary material for: Design and Evaluation of NSAID Derivatives as AKR1C3 Inhibitors for Breast Cancer Treatment through Computer-Aided Drug Design and In Vitro Analysis
Source: MDPI journal article supplement (doi:10.3390/molecules29081802), 2024-04-16

# **Design and Evaluation of NSAID Derivatives as AKR1C3 Inhibitors for Breast Cancer Treatment through Computer-Aided Drug Design and In Vitro Analysis**

Victoria Fonseca-Benítez,<sup>a</sup> Paola Acosta-Guzmán,<sup>a</sup> Juan Esteban Sánchez,<sup>a</sup> Zaira Alarcón,<sup>a</sup>  
Ronald Andrés Jiménez,<sup>a</sup> James Guevara-Pulido\*<sup>a</sup>

INQA, Química Farmacéutica, Facultad de Ciencias,<sup>b</sup> Universidad El Bosque<sup>b</sup>

\*joguevara@unbosque.edu.co

|                                                                       |          |
|-----------------------------------------------------------------------|----------|
| <b>Table S1 .....</b>                                                 | <b>2</b> |
| <b>BIOINFORMATICS .....</b>                                           | <b>3</b> |
| Figure S1 Boxplot outliers.....                                       | 3        |
| Figure S2 Pearson correlations descriptor vs descriptor .....         | 4        |
| Figure S3 Pearson correlations descriptor vs IC50 .....               | 4        |
| Figure S4 Goodness of fit and cross-validation of the QSAR mode ..... | 5        |
| <b>INTERACTIONS.....</b>                                              | <b>5</b> |
| <b>CHEMISTRY.....</b>                                                 | <b>6</b> |
| NMR spectra.....                                                      | 6        |
| IR-ATR Spectra.....                                                   | 8        |
| HPLC C-6 .....                                                        | 8        |

**Table S1**

| <b>MOLECULES</b>     | <b>(Kcal/mol)</b> | <b>IC<sub>50</sub> (μM)</b> |
|----------------------|-------------------|-----------------------------|
| Naproxen             | -8,6              | 0,48                        |
| Diclofenac           | -8,9              | 2,6                         |
| Flurbiprofen         | -9,3              | 7,8                         |
| Lornoxicam           | -8,7              | 0,7                         |
| Mefenamic acid       | -9,0              | 0,3                         |
| Ibuprofen            | -7,7              | 33                          |
| Celecoxib            | -10,4             | 5,2                         |
| Ketoprofen           | -9,0              | 6                           |
| Sulindaco            | -9,9              | 3,4                         |
| Indomethacin         | -9,4              | 2,3                         |
| Salicylic acid       | -10,4             | 770                         |
| Acetylsalicylic acid | -9,8              | 1200                        |
| Stylopine            | -11,5             | 7,7                         |
| Canada               | -10,2             | 29                          |
| Diazepam             | 9,8               | 84                          |
| Medazepam            | 8,8               | 116                         |
| Estazolam            | 9,8               | 47                          |
| Flunitrazepam        | 10,3              | 58                          |
| Cloxazolam           | 9,4               | 2,5                         |
| Bromazepam           | 9,3               | 8100                        |
| Oxazolam             | 6,5               | 2100                        |
| Oxazepam             | 10,3              | 1400                        |
| jasmonic acid        | -7,2              | 21                          |
| A1                   | -8,1              | 36,7                        |
| A2                   | -7,9              | 17,8                        |

|                                    |        |        |
|------------------------------------|--------|--------|
| A3                                 | -8,0   | 22,5   |
| A4                                 | -8,5   | 2,7    |
| A5                                 | -9,8   | 67,3   |
| A6                                 | -10,1  | 46,6   |
| A7                                 | -8,0   | 76,6   |
| Jasnic acid2'-<br>Hydroxyflavanone | -9,5   | 0,3    |
| Naringenin                         | 2,4    | -9,4   |
| Quercitrin                         | -8,9   | 18,8   |
| Luteolin                           | -9,4   | 37,4   |
| Apigenin                           | -9,4   | 21,8   |
| Silibinin                          | -9,3   | 6,2    |
| EM1404                             | -12,3  | 0,0032 |
| EM1424                             | -10,1  | 0,0095 |
| EM1396                             | -11,25 | 0,013  |
| MPA                                | -8,8   | 8,8    |

## BIOINFORMATICS

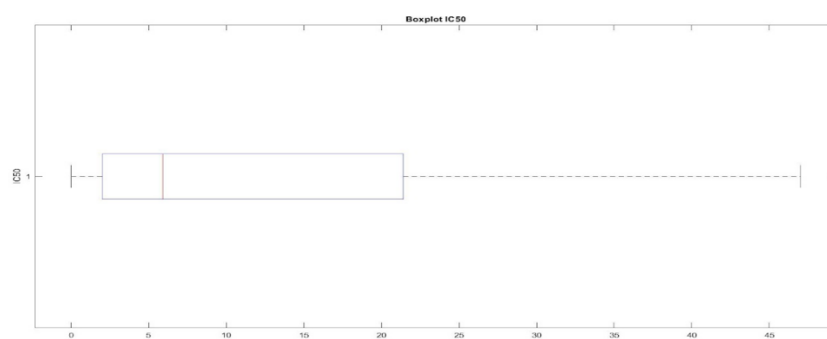

Figure S1 Boxplot outliers

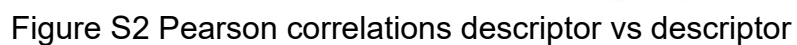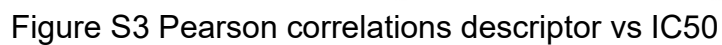

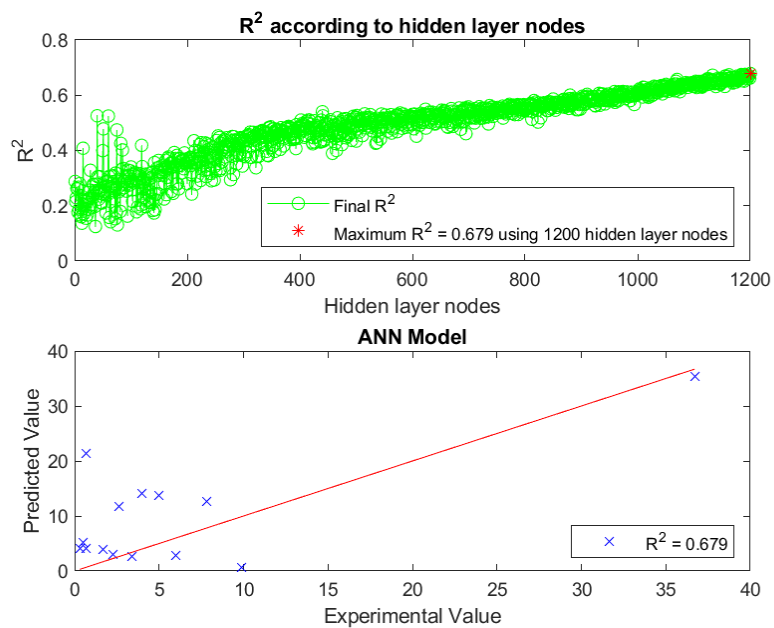

Figure S4 Goodness of fit and cross-validation of the QSAR mode  
INTERACTIONS

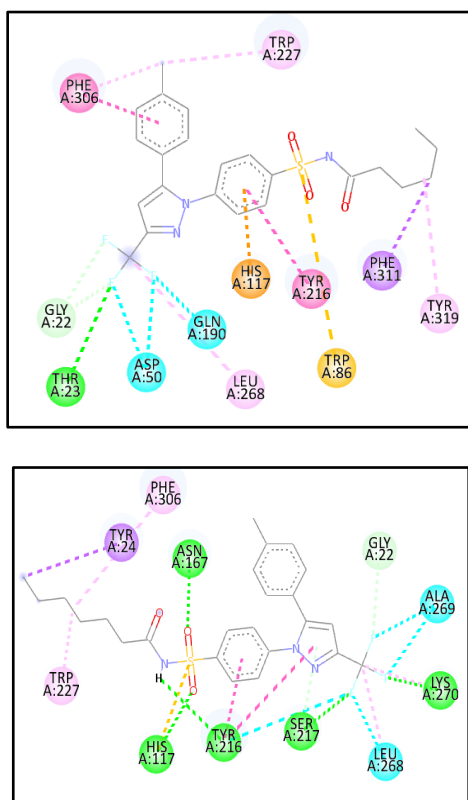

#### Interactions

|                                                                                   |                            |                                                                                     |                |
|-----------------------------------------------------------------------------------|----------------------------|-------------------------------------------------------------------------------------|----------------|
|  | Conventional Hydrogen Bond |  | Pi-Sulfur      |
|  | Carbon Hydrogen Bond       |  | Pi-Pi T-shaped |
|  | Halogen (Fluorine)         |  | Alkyl          |
|  | Pi-Cation                  |  | Pi-Alkyl       |
|  | Pi-Sigma                   |                                                                                     |                |

## CHEMISTRY

All reagents were used as received from commercial suppliers. Reaction progress was monitored by TLC performed on alumin plates coated with silica gel F<sub>254</sub> indicator and visualized by either UV irradiation or staining with iodine. Flash Chromatography was carried out by silica gel 60 (230–240 mesh). <sup>1</sup>H NMR and <sup>13</sup>C NMR spectra were recorded in MEOD using a Bruker Avance NEO 400 MHz spectrometer. Chemical shifts (<sup>1</sup>H and <sup>13</sup>C) are given in parts per million (ppm, δ), from tetramethylsilane as internal reference. <sup>1</sup>H NMR splitting patterns were designated as singlet (s), doublet (d), triplet (t), quartet (q) and multiplet (m); Coupling constants are quoted in Hertz (J) and integration. Infrared spectra were recorded using a Bruker Alpha-P ATR FTIR with diamond crystal. High Resolution Mass spectrometry was carried out on an Agilent 5973 (80 eV) spectrometer using electrospray ionization (ESI). All reagents were used as received from commercial suppliers.

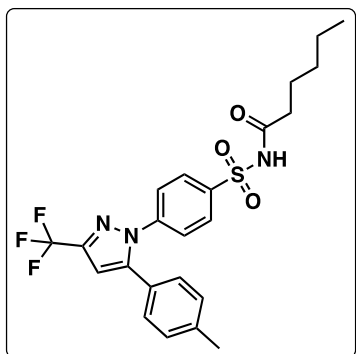

### *N-((4-(5-(p-tolyl)-3-(trifluoromethyl)-1H-pyrazol-1-yl)phenyl)sulfonyl)hexanamide*

**<sup>1</sup>H NMR (400 MHz, Methanol-*d*<sub>4</sub>)** δ 7.93 (d, *J* = 8.7 Hz, 2H), 7.48 (d, *J* = 8.7 Hz, 2H), 7.09 – 7.30 (m, 4H), 6.90 (s, 1H), 2.34 (s, 3H), 2.27 (t, *J* = 7.5 Hz, 2H), 1.49 – 1.68 (m, 2H), 1.16 – 1.42 (m, 4H), 0.91 (t, *J* = 6.9 Hz, 3H). **<sup>13</sup>C NMR (101 MHz, MeOD)** δ 177.7, 147.0,

145.0, 144.8 (q, *J* = 38 Hz) 143.2, 141.0, 130.6, 130.0, 128.3, 127.2, 127.0, 122.7 (q, *J* = 268.7 Hz), 106.9, 48.6, 34.9, 32.4, 25.8, 23.4, 21.3, 14.3. **FT-IR (neat) u(cm<sup>-1</sup>):** 3334, 3228, 2928, 1708, 1345, 1133, 1101. **HRMS (ESI):** C<sub>23</sub>H<sub>25</sub>F<sub>3</sub>N<sub>3</sub>O<sub>3</sub>S<sup>+</sup> [*M* + H<sup>+</sup>]: calc. 480.1563, found. 480.1566.

NMR spectra

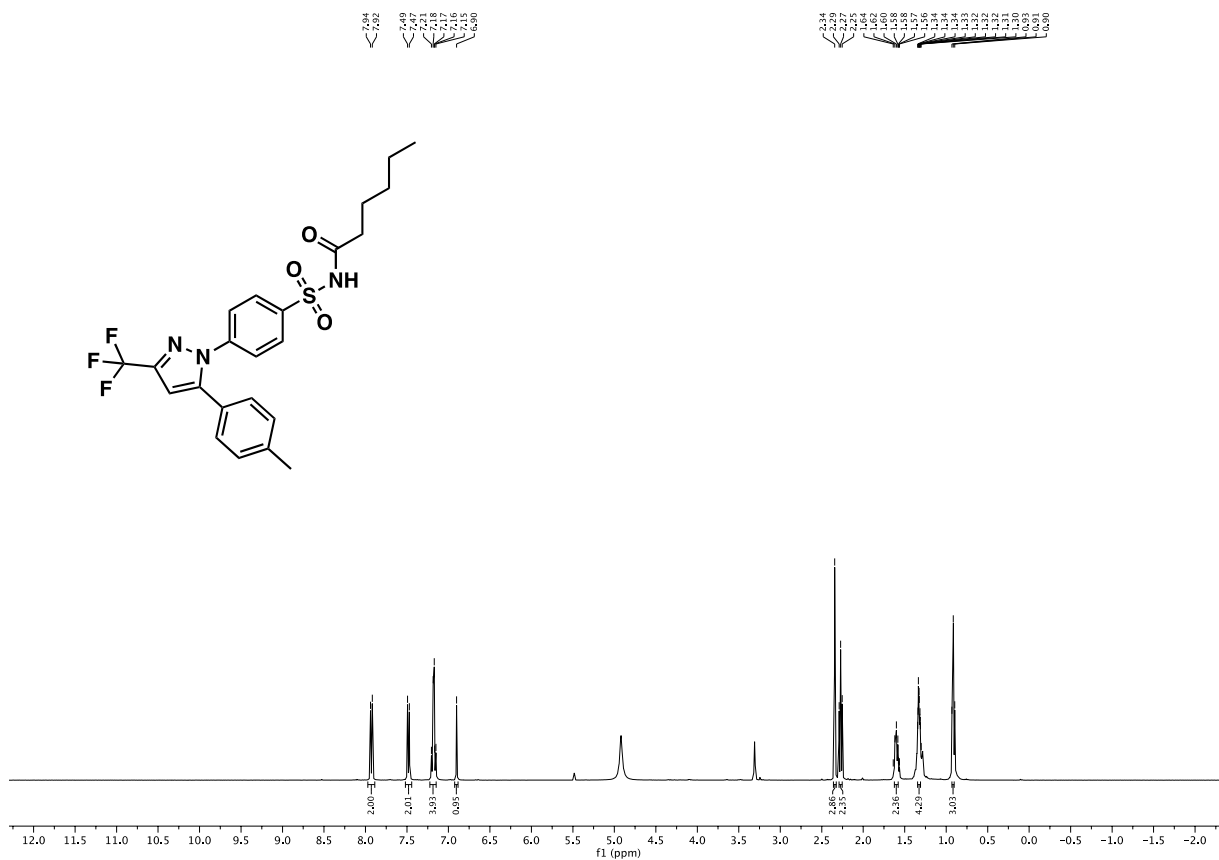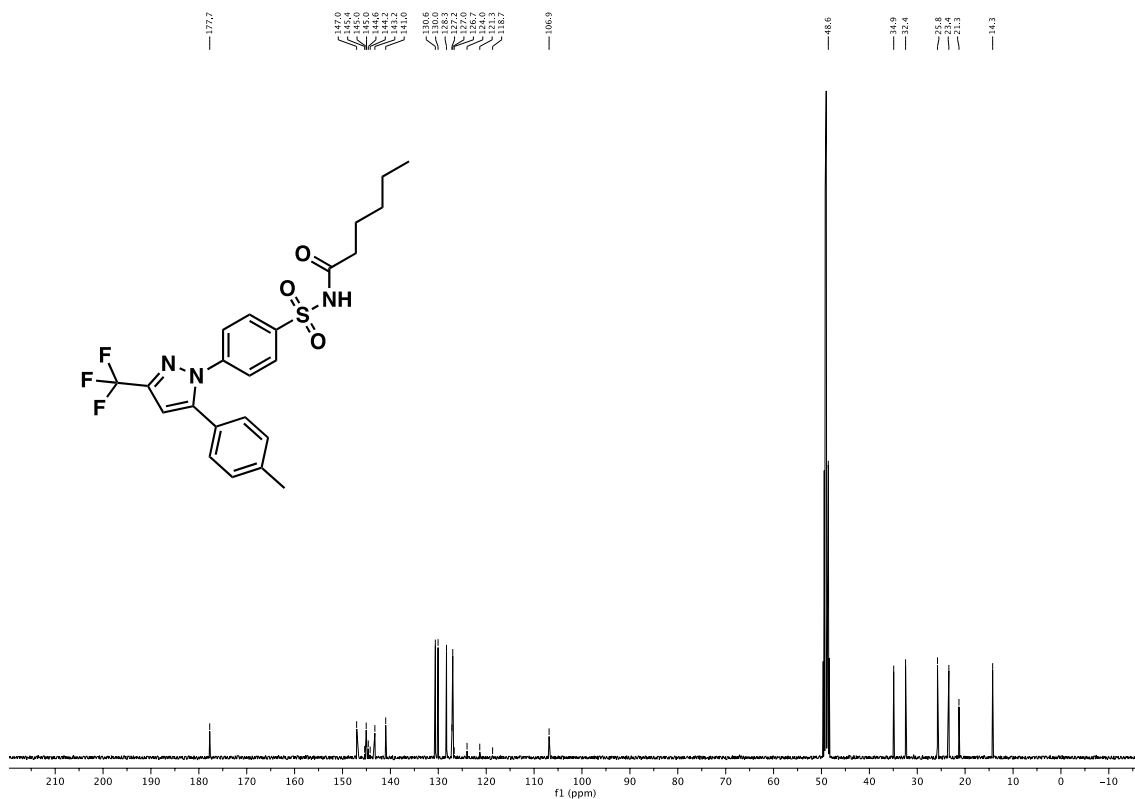

## IR-ATR Spectra

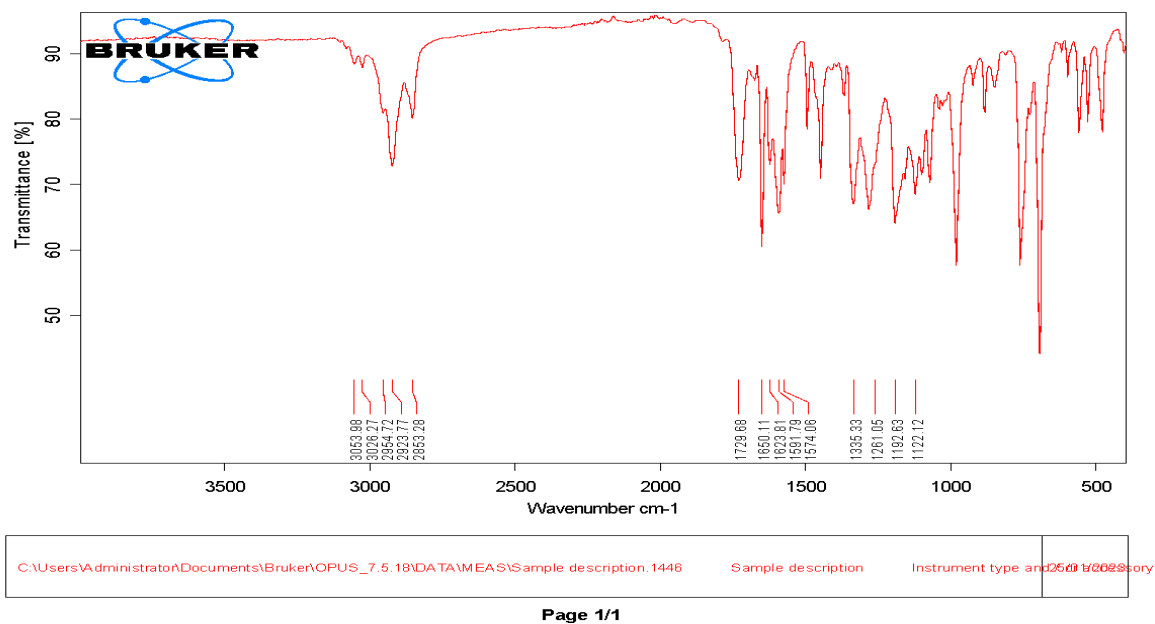

## HPLC C-6

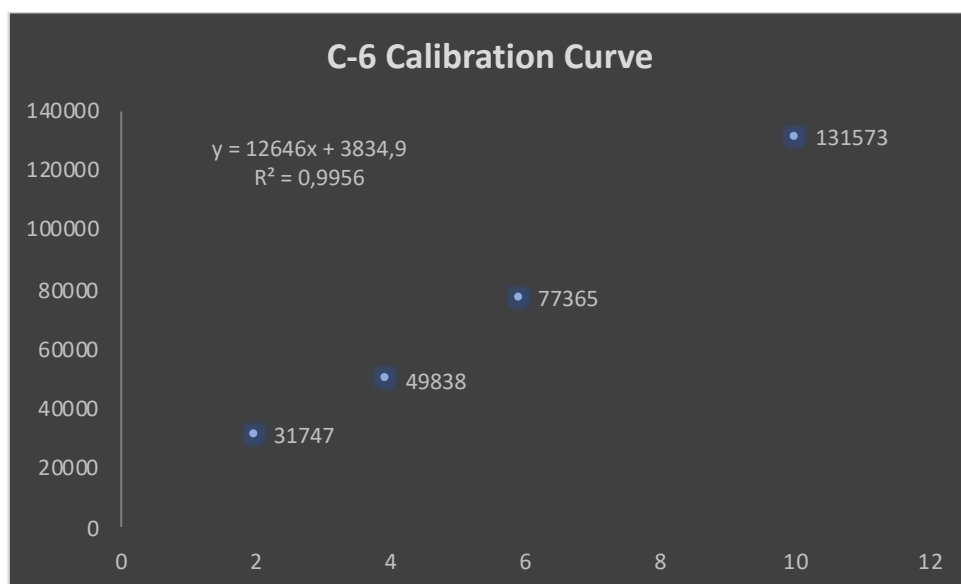

Supplement: s1 [file s1]
